# Supplementary material for: “From work as imagined to work as done” – exploration of how patient involvement is enacted in the Swedish national system for knowledge-driven management
Source: Research Square preprint supplement (doi:10.21203/rs.3.rs-6989618/v1), 2025-09-12
Supplement: Supplementary file [file b68c05f1dc449bcc7946a0ca.pdf]

## **Supplementary materials**

A semi-structured interview guide, informed by findings from the preceding document analysis, was used to ensure consistency while allowing for flexibility in the exploration of relevant themes. Four main questions guided the interviews:

- (1) Patient representatives are currently involved in parts of the system—what are your reflections on this?*
- (2) How would you describe your experience of patient involvement within the KMS?*
- (3) What are your views on patient involvement in the group you represent, and why?*
- (4) How do you think the system should evolve to achieve its intended outcomes in the future?*

Each main question was supplemented with predefined follow-up prompts, and additional probing questions were used to elicit further depth and nuance.
